# Supplementary material for: Folic acid supplementation normalizes the endothelial progenitor cell transcriptome of patients with type 1 diabetes: a case-control pilot study
Source: PubMed Central journal article supplement (PMC2739843; doi:10.1186/1475-2840-8-47), 2009-08-25
Supplement: 1475-2840-8-47-S1.pdf [file 1475-2840-8-47-S1.pdf]

|                  | Gene symbol   | Illumina Target ID | Fold change DM1/CTR | FDR      | Fold change DM1+FA/CTR | FDR      |
|------------------|---------------|--------------------|---------------------|----------|------------------------|----------|
| <u>cluster 1</u> | DKFZp547G0215 | GI_27735064-S      | 1,28                | < 1e-07  | 1,09                   | 2,21E-01 |
|                  | GNB5          | GI_20336269-I      | 1,29                | < 1e-07  | 1,09                   | 2,21E-01 |
|                  | LOC401295     | GI_42657675-S      | 1,25                | < 1e-07  | 1,05                   | 7,55E-01 |
|                  | LOC393037     | GI_41148356-S      | 1,25                | 1,71E-05 | 1,07                   | 2,21E-01 |
|                  | ADRA1A        | GI_15451758-I      | 1,20                | 1,92E-05 | 1,07                   | 2,85E-01 |
|                  | HAPLN4        | GI_30794471-S      | 1,19                | 1,92E-05 | 1,02                   | 9,09E-01 |
|                  | LOC401256     | GI_42657630-S      | 1,17                | 2,28E-05 | 1,08                   | 2,21E-01 |
|                  | FLJ43806      | GI_42491369-S      | 1,27                | 2,56E-05 | 1,08                   | 7,55E-01 |
|                  | HIST1H2BO     | GI_16306565-S      | 1,22                | 2,80E-05 | 1,04                   | 8,57E-01 |
|                  | GNAT1         | GI_22027519-A      | 1,19                | 2,99E-05 | 1,04                   | 8,57E-01 |
|                  | ID1           | GI_31317296-I      | 1,22                | 3,02E-05 | 1,06                   | 7,55E-01 |
|                  | KRN1          | GI_40254818-S      | 1,24                | 3,02E-05 | 1,01                   | 9,71E-01 |
|                  | LOC285941     | GI_42658244-S      | 1,30                | 3,02E-05 | 1,11                   | 2,21E-01 |
|                  | TCF2          | GI_6031204-I       | 1,23                | 3,02E-05 | 1,10                   | 2,21E-01 |
|                  | ZNF278        | GI_14670359-I      | 1,21                | 3,02E-05 | 1,05                   | 7,90E-01 |
|                  | KRT9          | GI_4557704-S       | 1,22                | 3,14E-05 | 1,02                   | 9,46E-01 |
|                  | LOC221061     | GI_37551029-S      | 1,20                | 4,15E-05 | 1,01                   | 9,71E-01 |
|                  | LOC378136     | GI_37539093-S      | 1,22                | 4,15E-05 | 1,09                   | 3,16E-01 |
|                  | OR1D5         | GI_7657422-S       | 1,17                | 4,15E-05 | 1,07                   | 3,58E-01 |
|                  | ADAM22        | GI_21536384-A      | 1,22                | 4,18E-05 | 1,02                   | 9,71E-01 |
|                  | DKFZp547I014  | GI_9910199-S       | 1,16                | 4,18E-05 | 1,04                   | 7,55E-01 |
|                  | GNAL          | GI_4504042-A       | 1,20                | 4,18E-05 | 1,01                   | 9,71E-01 |
|                  | LOC377739     | GI_37540349-S      | 1,14                | 4,18E-05 | 0,98                   | 9,05E-01 |
|                  | LOC402469     | GI_42658240-S      | 1,24                | 4,18E-05 | 1,04                   | 9,10E-01 |
|                  | SERPINC1      | GI_4502260-S       | 1,15                | 4,18E-05 | 1,01                   | 9,71E-01 |
|                  | SYNE2         | GI_33624860-I      | 1,27                | 4,95E-05 | 1,12                   | 2,21E-01 |
|                  | KIAA1937      | GI_37549525-S      | 1,26                | 5,30E-05 | 1,03                   | 9,04E-01 |
|                  | LOC375533     | GI_37551146-S      | 1,22                | 5,55E-05 | 1,04                   | 8,80E-01 |
|                  | LOC400517     | GI_42660934-S      | 1,15                | 5,55E-05 | 1,05                   | 7,55E-01 |
|                  | LOC401451     | GI_42658882-S      | 1,19                | 5,55E-05 | 1,06                   | 7,55E-01 |
|                  | MAGEA2b       | GI_34335237-S      | 1,18                | 5,55E-05 | 0,99                   | 9,71E-01 |
|                  | OR2S2         | GI_10092668-S      | 1,24                | 5,55E-05 | 1,06                   | 7,55E-01 |
|                  | RORA          | GI_19743902-I      | 1,19                | 5,55E-05 | 1,01                   | 9,71E-01 |

|           |               |      |          |      |          |
|-----------|---------------|------|----------|------|----------|
| SLC38A3   | GI_40795668-S | 1,20 | 5,55E-05 | 1,03 | 8,97E-01 |
| DDC       | GI_4503280-S  | 1,20 | 6,45E-05 | 1,04 | 8,03E-01 |
| B3GALT5   | GI_15451886-I | 1,25 | 7,14E-05 | 1,07 | 7,55E-01 |
| CYP26A1   | GI_16933529-I | 1,16 | 7,14E-05 | 1,00 | 9,71E-01 |
| CYP8B1    | GI_13929428-S | 1,15 | 7,14E-05 | 1,04 | 7,97E-01 |
| KCNS2     | GI_45433545-S | 1,20 | 7,14E-05 | 1,00 | 9,88E-01 |
| PITPNM2   | GI_24308236-S | 1,16 | 7,14E-05 | 1,04 | 8,57E-01 |
| RAMP3     | GI_5032022-S  | 1,18 | 7,14E-05 | 1,02 | 9,34E-01 |
| RHBDL4    | GI_21264325-S | 1,24 | 7,14E-05 | 1,04 | 8,82E-01 |
| LOC401939 | GI_42656018-S | 1,11 | 7,20E-05 | 1,01 | 9,34E-01 |
| BACH      | GI_32528285-I | 1,18 | 7,59E-05 | 1,00 | 9,71E-01 |
| LOC401032 | GI_42656581-S | 1,21 | 7,75E-05 | 0,98 | 9,61E-01 |
| LOC135924 | GI_37538531-S | 1,18 | 7,80E-05 | 1,07 | 7,55E-01 |
| RASAL2    | GI_25121934-A | 1,18 | 7,85E-05 | 1,03 | 8,97E-01 |
| KIAA0703  | GI_7662255-S  | 1,15 | 8,36E-05 | 1,04 | 7,55E-01 |
| SLC6A3    | GI_38194225-S | 1,21 | 8,36E-05 | 1,03 | 9,49E-01 |
| UGT1A8    | GI_31377617-S | 1,19 | 8,36E-05 | 1,03 | 9,34E-01 |
| CHAT      | GI_11038626-I | 1,24 | 8,86E-05 | 1,01 | 9,71E-01 |
| PCDHGA4   | GI_14196467-A | 1,13 | 9,80E-05 | 1,01 | 9,71E-01 |
| LOC127309 | GI_37548619-S | 1,28 | 1,00E-04 | 1,09 | 7,55E-01 |
| LOC153441 | GI_27481869-S | 1,17 | 1,00E-04 | 1,02 | 9,34E-01 |
| LOC254897 | GI_37548610-S | 1,22 | 1,00E-04 | 1,04 | 8,79E-01 |
| LOC255244 | GI_22064848-S | 1,25 | 1,00E-04 | 1,11 | 2,75E-01 |
| LOC374493 | GI_37545362-S | 1,18 | 1,00E-04 | 1,04 | 8,57E-01 |
| LPO       | GI_40549417-S | 1,22 | 1,00E-04 | 1,04 | 8,97E-01 |
| PACRG     | GI_22748868-S | 1,18 | 1,00E-04 | 1,04 | 8,57E-01 |
| PGR6      | GI_37547343-S | 1,21 | 1,00E-04 | 1,04 | 8,79E-01 |
| LOC401100 | GI_42656878-S | 1,21 | 1,02E-04 | 1,06 | 8,57E-01 |
| DMRTB1    | GI_24308351-S | 1,18 | 1,09E-04 | 1,03 | 9,32E-01 |
| FLJ90834  | GI_27734820-S | 1,30 | 1,09E-04 | 1,07 | 7,55E-01 |
| LOC375457 | GI_37550371-S | 1,19 | 1,09E-04 | 1,02 | 9,71E-01 |
| MGC27019  | GI_34222169-S | 1,26 | 1,09E-04 | 1,07 | 7,90E-01 |
| PTHLH     | GI_39995087-S | 1,28 | 1,09E-04 | 1,07 | 7,97E-01 |
| SLC22A1   | GI_23510408-I | 1,21 | 1,09E-04 | 1,06 | 7,84E-01 |
| ZNF585A   | GI_40217797-S | 1,33 | 1,09E-04 | 1,09 | 7,55E-01 |
| CDH3      | GI_45269142-S | 1,30 | 1,11E-04 | 1,05 | 8,57E-01 |

|           |               |      |          |      |          |
|-----------|---------------|------|----------|------|----------|
| FGF3      | GI_15451899-S | 1,21 | 1,11E-04 | 1,08 | 2,21E-01 |
| FLJ36561  | GI_32698877-S | 1,25 | 1,11E-04 | 1,05 | 8,57E-01 |
| LOC377697 | GI_37555920-S | 1,21 | 1,11E-04 | 1,00 | 9,88E-01 |
| PLAT      | GI_14702166-A | 1,18 | 1,11E-04 | 1,06 | 7,55E-01 |
| LOC387765 | GI_41200910-S | 1,13 | 1,14E-04 | 1,02 | 8,79E-01 |
| FLJ37357  | GI_27735076-S | 1,25 | 1,15E-04 | 1,05 | 8,79E-01 |
| FLJ40243  | GI_38564324-S | 1,17 | 1,15E-04 | 1,06 | 7,55E-01 |
| RPS4L     | GI_17484248-S | 1,19 | 1,15E-04 | 0,95 | 8,57E-01 |
| TFAP2BL1  | GI_27363485-S | 1,25 | 1,15E-04 | 1,03 | 9,34E-01 |
| ZFYVE27   | GI_34303918-S | 1,24 | 1,15E-04 | 1,05 | 8,57E-01 |
| FLJ35794  | GI_31377565-S | 1,17 | 1,16E-04 | 1,01 | 9,71E-01 |
| LOC254109 | GI_37545358-S | 1,15 | 1,18E-04 | 1,01 | 9,71E-01 |
| ARTN      | GI_16950639-I | 1,27 | 1,19E-04 | 1,02 | 9,54E-01 |
| PPP1R1B   | GI_21735491-I | 1,14 | 1,26E-04 | 1,00 | 9,77E-01 |
| SPRL4A    | GI_30387641-S | 1,25 | 1,26E-04 | 1,03 | 8,79E-01 |
| KIAA0265  | GI_44917618-S | 1,22 | 1,29E-04 | 1,06 | 7,97E-01 |
| CAMTA2    | GI_29826340-S | 1,24 | 1,31E-04 | 1,01 | 9,71E-01 |
| FIS       | GI_31342253-S | 1,24 | 1,31E-04 | 1,07 | 7,97E-01 |
| LOC400047 | GI_42659974-S | 1,18 | 1,37E-04 | 0,98 | 9,49E-01 |
| MLLT6     | GI_5174576-S  | 1,13 | 1,37E-04 | 0,98 | 9,49E-01 |
| PTPRH     | GI_4506312-S  | 1,24 | 1,47E-04 | 1,01 | 9,71E-01 |
| LOC151451 | GI_18553104-S | 1,24 | 1,54E-04 | 1,06 | 8,57E-01 |
| ADORA1    | GI_4501946-S  | 1,16 | 1,60E-04 | 1,05 | 7,55E-01 |
| DIABLO    | GI_42544196-A | 1,49 | 1,68E-04 | 1,16 | 7,55E-01 |
| PLUNC     | GI_18765703-A | 1,27 | 1,75E-04 | 1,04 | 8,97E-01 |
| VN1R1     | GI_18105064-S | 1,17 | 1,75E-04 | 1,01 | 9,71E-01 |
| GALNT5    | GI_32698685-S | 1,19 | 1,84E-04 | 0,99 | 9,71E-01 |
| LOC219858 | GI_20558728-S | 1,22 | 1,87E-04 | 1,03 | 9,34E-01 |
| FLJ37396  | GI_27734722-S | 1,53 | 1,92E-04 | 1,05 | 9,05E-01 |
| LOC283816 | GI_37541417-S | 1,21 | 1,93E-04 | 1,05 | 8,57E-01 |
| SLA/LP    | GI_24432103-I | 1,26 | 1,98E-04 | 0,99 | 9,71E-01 |
| FLJ20519  | GI_34147608-S | 1,17 | 1,99E-04 | 1,06 | 7,55E-01 |
| ARHGAP8   | GI_31317213-I | 1,23 | 2,03E-04 | 1,02 | 9,71E-01 |
| B3GALT1   | GI_15451870-S | 1,25 | 2,03E-04 | 0,99 | 9,71E-01 |
| DSCR10    | GI_22380642-S | 1,21 | 2,03E-04 | 1,03 | 9,34E-01 |
| RNF129    | GI_37622897-S | 1,18 | 2,03E-04 | 0,98 | 9,46E-01 |

|           |               |      |          |      |          |
|-----------|---------------|------|----------|------|----------|
| AKT2      | GI_6715585-S  | 1,18 | 2,06E-04 | 1,04 | 8,57E-01 |
| KIAA0889  | GI_23308686-I | 1,24 | 2,06E-04 | 1,01 | 9,71E-01 |
| PRKAB2    | GI_40254820-S | 1,25 | 2,06E-04 | 1,06 | 8,57E-01 |
| LOC283604 | GI_37546007-S | 1,17 | 2,07E-04 | 1,01 | 9,71E-01 |
| APOBEC3C  | GI_22907038-S | 1,26 | 2,12E-04 | 0,98 | 9,71E-01 |
| GABBR1    | GI_11497611-I | 1,27 | 2,12E-04 | 1,06 | 8,57E-01 |
| NOXO1     | GI_34222190-S | 1,19 | 2,12E-04 | 1,00 | 9,82E-01 |
| SPAG8     | GI_27502372-A | 1,30 | 2,12E-04 | 1,01 | 9,71E-01 |
| ITIH3     | GI_10092578-S | 1,17 | 2,17E-04 | 1,01 | 9,71E-01 |
| PDLIM1    | GI_20127594-S | 1,32 | 2,21E-04 | 1,02 | 9,71E-01 |
| FLJ13769  | GI_13376532-S | 1,88 | 2,21E-04 | 1,16 | 8,03E-01 |
| FLJ34907  | GI_29743984-S | 1,15 | 2,21E-04 | 1,02 | 9,16E-01 |
| LOC377169 | GI_37540377-S | 1,17 | 2,21E-04 | 1,00 | 9,87E-01 |
| STARD6    | GI_21040260-S | 1,16 | 2,41E-04 | 1,04 | 7,97E-01 |
| CYP20A1   | GI_29171729-I | 1,22 | 2,50E-04 | 1,05 | 8,57E-01 |
| KRT8      | GI_4504918-S  | 1,23 | 2,59E-04 | 1,01 | 9,71E-01 |
| VGLL1     | GI_31543932-S | 1,20 | 2,59E-04 | 1,05 | 8,57E-01 |
| FLJ36004  | GI_22749214-S | 1,19 | 2,75E-04 | 1,05 | 7,97E-01 |
| DUOX2     | GI_28872752-S | 1,27 | 2,76E-04 | 1,08 | 8,57E-01 |
| FLJ90165  | GI_23503264-S | 1,13 | 2,76E-04 | 1,02 | 8,97E-01 |
| LOC219870 | GI_20558763-S | 1,18 | 2,76E-04 | 1,06 | 7,55E-01 |
| LOC376583 | GI_37547270-S | 1,19 | 2,76E-04 | 0,97 | 9,18E-01 |
| CACNG1    | GI_22027542-S | 1,16 | 2,76E-04 | 0,99 | 9,71E-01 |
| IRX2      | GI_39930474-S | 1,17 | 2,78E-04 | 0,99 | 9,71E-01 |
| KIAA1110  | GI_42660071-S | 1,17 | 2,78E-04 | 1,02 | 9,57E-01 |
| SYT7      | GI_38570145-S | 1,14 | 2,81E-04 | 0,97 | 8,79E-01 |
| ISL1      | GI_4504736-S  | 1,22 | 2,84E-04 | 1,00 | 9,82E-01 |
| PSCA      | GI_29893565-S | 1,16 | 2,87E-04 | 1,05 | 7,55E-01 |
| PCDHGB3   | GI_14270495-A | 1,13 | 2,88E-04 | 0,99 | 9,71E-01 |
| MGC40574  | GI_31341814-S | 1,20 | 2,94E-04 | 1,03 | 8,97E-01 |
| LOC375407 | GI_37539713-S | 1,18 | 2,97E-04 | 1,04 | 8,79E-01 |
| ADIPOR2   | GI_38261972-S | 1,18 | 2,98E-04 | 0,94 | 8,57E-01 |
| KIAA0953  | GI_37546856-S | 1,15 | 2,98E-04 | 0,95 | 7,55E-01 |
| LOC400854 | GI_42662088-S | 1,26 | 3,03E-04 | 0,98 | 9,71E-01 |
| KIAA1337  | GI_18548545-S | 1,16 | 3,04E-04 | 1,08 | 3,24E-01 |
| LOC388300 | GI_41150381-S | 1,17 | 3,04E-04 | 1,00 | 9,87E-01 |

|           |               |      |          |      |          |
|-----------|---------------|------|----------|------|----------|
| COL1A1    | GI_14719826-S | 1,13 | 3,07E-04 | 0,97 | 9,04E-01 |
| FLJ11004  | GI_31542664-S | 1,23 | 3,07E-04 | 1,05 | 8,80E-01 |
| WNT11     | GI_17017973-S | 1,22 | 3,07E-04 | 0,94 | 8,76E-01 |
| GFER      | GI_4885264-S  | 1,18 | 3,08E-04 | 0,99 | 9,71E-01 |
| EDAR      | GI_11641230-S | 1,19 | 3,08E-04 | 1,06 | 7,55E-01 |
| LOC375203 | GI_37546908-S | 1,22 | 3,08E-04 | 1,07 | 7,55E-01 |
| LOC400629 | GI_42661060-S | 1,15 | 3,08E-04 | 1,00 | 9,71E-01 |
| A4GALT    | GI_34222135-S | 1,20 | 3,12E-04 | 0,96 | 9,33E-01 |
| CHODL     | GI_20127635-S | 1,15 | 3,14E-04 | 0,98 | 9,61E-01 |
| CKLFSF1   | GI_31563411-A | 1,22 | 3,19E-04 | 1,01 | 9,71E-01 |
| WDR5B     | GI_42544246-S | 1,23 | 3,19E-04 | 1,05 | 8,57E-01 |
| CSAGE     | GI_24234759-I | 1,19 | 3,23E-04 | 1,04 | 8,57E-01 |
| FLJ23235  | GI_13376422-S | 1,78 | 3,23E-04 | 1,05 | 9,71E-01 |
| NCR2      | GI_28395019-S | 1,21 | 3,28E-04 | 1,01 | 9,71E-01 |
| MADCAM1   | GI_18780284-A | 1,11 | 3,29E-04 | 0,95 | 7,56E-01 |
| SNAI1     | GI_18765740-S | 1,16 | 3,47E-04 | 1,00 | 9,71E-01 |
| YAP       | GI_20986485-I | 1,16 | 3,49E-04 | 1,01 | 9,71E-01 |
| C1orf36   | GI_34098969-S | 1,16 | 3,54E-04 | 0,97 | 9,10E-01 |
| MSH5      | GI_26638661-I | 1,22 | 3,54E-04 | 1,09 | 7,55E-01 |
| ADAM2     | GI_11497606-S | 1,18 | 3,70E-04 | 1,03 | 9,32E-01 |
| BASE      | GI_28372506-S | 1,19 | 3,70E-04 | 1,04 | 8,97E-01 |
| COH1      | GI_35493724-I | 1,24 | 3,70E-04 | 1,04 | 8,98E-01 |
| GPR135    | GI_32261308-S | 1,25 | 3,70E-04 | 1,04 | 9,04E-01 |
| SLCO1B1   | GI_19923779-S | 1,19 | 3,70E-04 | 1,01 | 9,71E-01 |
| SULF1     | GI_29789063-S | 1,17 | 3,70E-04 | 1,07 | 7,55E-01 |
| TPM1      | GI_34222222-S | 1,18 | 3,70E-04 | 0,96 | 8,97E-01 |
| LOC375512 | GI_37552209-S | 1,18 | 3,85E-04 | 0,99 | 9,71E-01 |
| C20orf179 | GI_30425403-S | 1,26 | 3,87E-04 | 1,08 | 7,97E-01 |
| HIRA      | GI_21536484-S | 1,33 | 3,87E-04 | 1,00 | 9,88E-01 |
| ITGB1     | GI_19743814-I | 1,15 | 3,87E-04 | 1,00 | 9,73E-01 |
| KIAA1409  | GI_37545989-S | 1,17 | 3,87E-04 | 1,01 | 9,71E-01 |
| NKX2-2    | GI_32307133-S | 1,19 | 3,87E-04 | 1,00 | 9,88E-01 |
| PCDHB8    | GI_14195614-S | 1,16 | 3,87E-04 | 0,99 | 9,71E-01 |
| SLC23A1   | GI_44680144-I | 1,15 | 3,87E-04 | 1,02 | 9,34E-01 |
| SOX7      | GI_30581119-S | 1,20 | 3,87E-04 | 1,05 | 8,79E-01 |
| TMC3      | GI_32469500-S | 1,15 | 3,87E-04 | 1,03 | 8,79E-01 |

|              |               |      |          |      |          |
|--------------|---------------|------|----------|------|----------|
| CNTN5        | GI_28373127-I | 1,17 | 3,91E-04 | 1,01 | 9,71E-01 |
| AMACO        | GI_38348303-S | 1,11 | 4,04E-04 | 1,03 | 8,57E-01 |
| ARHGAP6      | GI_7382476-I  | 1,18 | 4,04E-04 | 1,03 | 9,09E-01 |
| ELA2B        | GI_7705647-S  | 1,15 | 4,04E-04 | 1,02 | 9,40E-01 |
| PTP9Q22      | GI_30089951-I | 1,16 | 4,04E-04 | 1,04 | 8,57E-01 |
| SLC14A1      | GI_7706676-S  | 1,54 | 4,04E-04 | 1,04 | 9,58E-01 |
| KIAA0211     | GI_7661999-S  | 1,17 | 4,09E-04 | 0,99 | 9,71E-01 |
| LOC138802    | GI_37540519-S | 1,16 | 4,10E-04 | 1,04 | 8,79E-01 |
| LOC285647    | GI_37550419-S | 1,13 | 4,10E-04 | 1,00 | 9,71E-01 |
| LOC400537    | GI_42660771-S | 1,43 | 4,12E-04 | 0,98 | 9,71E-01 |
| C6orf61      | GI_8923164-S  | 1,29 | 4,18E-04 | 1,02 | 9,71E-01 |
| KIR3DS1      | GI_7657280-S  | 1,17 | 4,18E-04 | 1,02 | 9,71E-01 |
| LOC375472    | GI_37550199-S | 1,14 | 4,18E-04 | 1,00 | 9,87E-01 |
| SLMAP        | GI_6005873-S  | 1,11 | 4,18E-04 | 0,96 | 7,55E-01 |
| LOC377129    | GI_37550263-S | 1,16 | 4,30E-04 | 1,05 | 7,55E-01 |
| LOC339942    | GI_42656826-S | 1,20 | 4,32E-04 | 0,99 | 9,71E-01 |
| POLR2J2      | GI_21704273-I | 1,14 | 4,32E-04 | 0,98 | 9,71E-01 |
| LOC387982    | GI_42660251-S | 1,29 | 4,33E-04 | 0,98 | 9,71E-01 |
| DKFZP566D193 | GI_32698709-S | 1,17 | 4,35E-04 | 0,97 | 9,61E-01 |
| FLJ11164     | GI_8922910-S  | 1,25 | 4,35E-04 | 1,02 | 9,71E-01 |
| NTRK2        | GI_21361305-S | 1,26 | 4,35E-04 | 1,04 | 9,10E-01 |
| ERBB2        | GI_4758297-S  | 1,15 | 4,40E-04 | 0,95 | 8,57E-01 |
| TCF20        | GI_31652243-I | 1,20 | 4,40E-04 | 0,99 | 9,71E-01 |
| LOC377625    | GI_37552685-S | 1,17 | 4,44E-04 | 1,01 | 9,71E-01 |
| LOC401135    | GI_42657007-S | 1,20 | 4,44E-04 | 0,92 | 7,97E-01 |
| TPSG1        | GI_6912727-S  | 1,18 | 4,63E-04 | 1,04 | 8,79E-01 |
| LOC377120    | GI_37550713-S | 1,11 | 4,66E-04 | 0,97 | 7,97E-01 |
| KIAA0133     | GI_7661931-S  | 1,29 | 4,77E-04 | 1,01 | 9,71E-01 |
| RANBP17      | GI_22095364-S | 1,18 | 4,88E-04 | 1,03 | 9,34E-01 |
| GSG1         | GI_24432099-I | 1,20 | 4,90E-04 | 0,99 | 9,71E-01 |
| CLCNKB       | GI_4557474-S  | 1,24 | 4,99E-04 | 1,05 | 9,10E-01 |
| PEPP-2       | GI_14249118-S | 1,16 | 4,99E-04 | 1,04 | 8,79E-01 |
| C9orf41      | GI_22748888-S | 1,13 | 5,01E-04 | 0,98 | 9,57E-01 |
| BPGM         | GI_40353763-I | 1,18 | 5,13E-04 | 0,98 | 9,34E-01 |
| C14orf126    | GI_18087836-S | 1,34 | 5,13E-04 | 0,99 | 9,71E-01 |
| DAPK2        | GI_14670382-S | 1,18 | 5,13E-04 | 1,01 | 9,71E-01 |

|           |               |      |          |      |          |
|-----------|---------------|------|----------|------|----------|
| LOC115648 | GI_21687265-S | 1,24 | 5,13E-04 | 0,99 | 9,71E-01 |
| RNPS1     | GI_18379335-I | 1,16 | 5,13E-04 | 0,98 | 9,71E-01 |
| SNAP23    | GI_18765728-I | 1,24 | 5,13E-04 | 1,04 | 9,34E-01 |
| TGFBR1    | GI_4759225-S  | 1,20 | 5,15E-04 | 1,04 | 9,16E-01 |
| FABP7     | GI_36054052-S | 1,16 | 5,26E-04 | 1,03 | 8,98E-01 |
| ZNF533    | GI_31542751-S | 1,21 | 5,27E-04 | 1,02 | 9,71E-01 |
| HACE1     | GI_34222116-S | 1,17 | 5,33E-04 | 1,02 | 9,61E-01 |
| KIAA2028  | GI_45120120-S | 1,19 | 5,45E-04 | 1,01 | 9,71E-01 |
| FISH      | GI_7662103-S  | 1,15 | 5,47E-04 | 1,01 | 9,71E-01 |
| LOC286103 | GI_31341777-S | 1,15 | 5,47E-04 | 0,97 | 8,79E-01 |
| LOC389690 | GI_41148533-S | 1,19 | 5,48E-04 | 0,96 | 9,09E-01 |
| UPK3A     | GI_5902151-S  | 1,14 | 5,48E-04 | 1,00 | 9,71E-01 |
| LGR7      | GI_11056007-S | 1,13 | 5,65E-04 | 1,01 | 9,71E-01 |
| LOC388009 | GI_42660347-S | 1,17 | 5,79E-04 | 1,04 | 8,57E-01 |
| LOC401620 | GI_42662643-S | 1,27 | 5,82E-04 | 1,03 | 9,34E-01 |
| SHOX      | GI_6031202-I  | 1,20 | 5,83E-04 | 1,06 | 8,57E-01 |
| LOC121792 | GI_17475183-S | 1,17 | 5,84E-04 | 1,00 | 9,99E-01 |
| FLJ39421  | GI_31341837-S | 1,15 | 5,91E-04 | 0,97 | 8,79E-01 |
| FRMD1     | GI_24432019-S | 1,14 | 5,91E-04 | 0,99 | 9,71E-01 |
| LOC122740 | GI_37546044-S | 1,16 | 5,95E-04 | 1,03 | 9,09E-01 |
| VCL       | GI_7669549-I  | 1,16 | 5,95E-04 | 1,01 | 9,71E-01 |
| GRAP2     | GI_19913386-S | 1,27 | 5,97E-04 | 0,99 | 9,71E-01 |
| C14orf29  | GI_32528309-A | 1,19 | 5,97E-04 | 0,97 | 9,04E-01 |
| FKBP2     | GI_17149843-A | 1,17 | 5,97E-04 | 1,03 | 9,16E-01 |
| LOC374386 | GI_37541628-S | 1,15 | 5,97E-04 | 1,00 | 9,88E-01 |
| PCDH8     | GI_6631101-I  | 1,16 | 6,10E-04 | 1,01 | 9,71E-01 |
| APOBEC3F  | GI_31083201-S | 1,41 | 6,11E-04 | 1,00 | 9,88E-01 |
| LOC400690 | GI_42661599-S | 1,41 | 6,11E-04 | 1,06 | 9,34E-01 |
| AK5       | GI_28144896-A | 1,21 | 6,14E-04 | 1,05 | 8,57E-01 |
| LOC376709 | GI_37539612-S | 1,18 | 6,19E-04 | 1,05 | 8,57E-01 |
| BLR1      | GI_14589868-I | 1,17 | 6,34E-04 | 1,00 | 9,96E-01 |
| FLJ36070  | GI_32698969-S | 1,19 | 6,39E-04 | 1,04 | 8,98E-01 |
| LOC400051 | GI_42659981-S | 1,15 | 6,42E-04 | 0,92 | 7,55E-01 |
| ACE       | GI_23238215-I | 1,13 | 6,53E-04 | 0,99 | 9,71E-01 |
| LOC348938 | GI_37549910-S | 1,24 | 6,53E-04 | 1,01 | 9,71E-01 |
| P2RX2     | GI_28416918-I | 1,15 | 6,53E-04 | 0,99 | 9,71E-01 |

|           |               |      |          |      |          |
|-----------|---------------|------|----------|------|----------|
| KIAA1463  | GI_39930390-S | 1,29 | 6,67E-04 | 0,98 | 9,71E-01 |
| SSH-3     | GI_24586674-I | 1,15 | 6,72E-04 | 1,01 | 9,71E-01 |
| CRIL      | GI_30146994-S | 1,24 | 6,73E-04 | 1,04 | 8,97E-01 |
| LOC402458 | GI_42658205-S | 1,18 | 6,73E-04 | 0,99 | 9,71E-01 |
| RBM8A     | GI_15812217-S | 1,21 | 6,73E-04 | 1,00 | 9,92E-01 |
| CYP4F11   | GI_10863992-S | 1,18 | 6,76E-04 | 0,96 | 8,57E-01 |
| GTPBP5    | GI_31563510-S | 1,20 | 6,76E-04 | 1,01 | 9,71E-01 |
| LOC400465 | GI_42660608-S | 1,14 | 6,80E-04 | 0,98 | 9,34E-01 |
| LOC151760 | GI_27478003-S | 1,24 | 6,80E-04 | 1,03 | 9,34E-01 |
| FLJ31121  | GI_21389510-S | 1,15 | 6,91E-04 | 0,93 | 7,97E-01 |
| UNQ2446   | GI_38348201-S | 1,17 | 6,91E-04 | 0,99 | 9,71E-01 |
| WFS1      | GI_13376995-S | 1,23 | 6,96E-04 | 0,98 | 9,71E-01 |
| ZNF577    | GI_14249251-S | 1,39 | 7,00E-04 | 1,05 | 9,34E-01 |
| CSRP2BP   | GI_29570787-A | 1,23 | 7,02E-04 | 1,04 | 9,34E-01 |
| MYCBP     | GI_8850230-S  | 1,19 | 7,07E-04 | 0,97 | 9,71E-01 |
| EGFL8     | GI_13449286-S | 1,18 | 7,09E-04 | 0,97 | 9,09E-01 |
| MGC35468  | GI_23397531-S | 1,12 | 7,09E-04 | 0,93 | 5,86E-01 |
| PLA2G3    | GI_7657125-S  | 1,12 | 7,19E-04 | 0,98 | 9,34E-01 |
| KIAA1962  | GI_27478473-S | 1,10 | 7,24E-04 | 0,96 | 7,90E-01 |
| LOC375328 | GI_37550019-S | 1,11 | 7,24E-04 | 1,01 | 9,71E-01 |
| NOL1      | GI_5453791-S  | 1,25 | 7,24E-04 | 1,04 | 9,34E-01 |
| POP5      | GI_38016925-I | 1,17 | 7,24E-04 | 1,00 | 9,88E-01 |
| SV2A      | GI_7662271-S  | 1,20 | 7,24E-04 | 1,04 | 9,04E-01 |
| NCK2      | GI_4505346-S  | 1,21 | 7,25E-04 | 1,02 | 9,71E-01 |
| CNGA2     | GI_42718010-S | 1,17 | 7,29E-04 | 0,99 | 9,71E-01 |
| C6orf64   | GI_8922866-S  | 1,26 | 7,35E-04 | 0,99 | 9,71E-01 |
| PROL1     | GI_10864034-S | 1,17 | 7,35E-04 | 1,02 | 9,41E-01 |
| FLJ12747  | GI_37563751-S | 1,16 | 7,39E-04 | 1,02 | 9,71E-01 |
| NEK7      | GI_19424131-S | 1,18 | 7,49E-04 | 1,01 | 9,71E-01 |
| RAX       | GI_7305450-S  | 1,11 | 7,55E-04 | 0,98 | 9,34E-01 |
| KCNJ14    | GI_25777633-I | 1,23 | 7,55E-04 | 0,99 | 9,71E-01 |
| TRPM5     | GI_24475627-S | 1,13 | 7,57E-04 | 0,98 | 9,09E-01 |
| IBSP      | GI_13259536-S | 1,13 | 7,62E-04 | 0,95 | 7,55E-01 |
| MAP1D     | GI_40385866-S | 1,20 | 7,76E-04 | 0,98 | 9,71E-01 |
| LOC120082 | GI_37541482-S | 1,12 | 7,80E-04 | 0,97 | 8,96E-01 |
| LOC283162 | GI_27499140-S | 1,22 | 7,80E-04 | 1,04 | 8,97E-01 |



|           |               |      |          |      |          |
|-----------|---------------|------|----------|------|----------|
| C21orf70  | GI_17158022-S | 1,26 | 7,82E-04 | 1,05 | 9,09E-01 |
| FLJ35487  | GI_28395052-S | 1,14 | 7,90E-04 | 1,02 | 9,09E-01 |
| FBXO9     | GI_15812200-I | 1,22 | 7,95E-04 | 0,99 | 9,71E-01 |
| LOC402471 | GI_42658248-S | 1,16 | 7,96E-04 | 0,95 | 8,57E-01 |
| UNQ541    | GI_45504356-S | 1,18 | 7,96E-04 | 0,96 | 8,97E-01 |
| LCN7      | GI_11545917-S | 1,14 | 8,15E-04 | 0,96 | 8,57E-01 |
| KIAA1272  | GI_37556088-S | 1,16 | 8,15E-04 | 1,00 | 9,88E-01 |
| LOC375108 | GI_39752678-S | 1,16 | 8,17E-04 | 0,98 | 9,71E-01 |
| TRIM50A   | GI_31342404-S | 1,15 | 8,17E-04 | 0,95 | 8,57E-01 |
| EPAS1     | GI_41327154-S | 1,16 | 8,25E-04 | 1,03 | 9,09E-01 |
| LOC165186 | GI_40548323-S | 1,11 | 8,28E-04 | 1,00 | 9,71E-01 |
| LOC339541 | GI_37547044-S | 1,20 | 8,50E-04 | 1,03 | 9,34E-01 |
| FLJ14100  | GI_13376545-S | 1,17 | 8,51E-04 | 1,01 | 9,71E-01 |
| GABRA6    | GI_4557606-S  | 1,20 | 8,51E-04 | 1,03 | 9,36E-01 |
| TGM1      | GI_4507474-S  | 1,30 | 8,91E-04 | 0,98 | 9,71E-01 |
| IREM2     | GI_31324529-S | 1,10 | 8,94E-04 | 1,00 | 9,71E-01 |
| C6orf212  | GI_27482725-S | 1,15 | 9,21E-04 | 0,99 | 9,71E-01 |
| RFXDC1    | GI_27734870-S | 1,14 | 9,35E-04 | 1,00 | 9,71E-01 |
| LOC131405 | GI_37550025-S | 1,11 | 9,41E-04 | 1,01 | 9,71E-01 |
| RBPSUH    | GI_34304114-I | 1,12 | 9,69E-04 | 0,97 | 8,97E-01 |
| UGT8      | GI_40254470-S | 1,15 | 9,87E-04 | 1,00 | 9,88E-01 |
| FLJ10874  | GI_8922727-S  | 1,12 | 1,00E-03 | 1,02 | 9,34E-01 |
| KCNF1     | GI_27436998-S | 1,13 | 1,00E-03 | 1,01 | 9,71E-01 |
| SFTPC     | GI_42476334-S | 1,10 | 1,05E-03 | 0,99 | 9,63E-01 |
| LOC286436 | GI_37546232-S | 1,17 | 1,05E-03 | 1,04 | 8,97E-01 |
| FLJ31882  | GI_22748970-S | 1,18 | 1,05E-03 | 1,01 | 9,71E-01 |
| MGC10731  | GI_34147392-S | 1,16 | 1,06E-03 | 0,98 | 9,58E-01 |
| CKM       | GI_21536287-S | 1,20 | 1,11E-03 | 0,98 | 9,71E-01 |
| LOH12CR1  | GI_31377627-S | 1,12 | 1,11E-03 | 0,98 | 9,30E-01 |
| MGC2562   | GI_39725653-S | 1,38 | 1,11E-03 | 0,97 | 9,71E-01 |
| LOC377266 | GI_37550443-S | 1,19 | 1,11E-03 | 1,01 | 9,71E-01 |
| NYD-SP18  | GI_14211934-S | 1,20 | 1,11E-03 | 1,02 | 9,71E-01 |
| SYT8      | GI_32528307-S | 1,19 | 1,11E-03 | 0,99 | 9,71E-01 |
| MGC48595  | GI_42558269-S | 1,12 | 1,12E-03 | 0,95 | 8,03E-01 |
| KCNK4     | GI_15718766-I | 1,16 | 1,14E-03 | 1,02 | 9,71E-01 |
| U1SNRNPBP | GI_31077202-A | 1,28 | 1,14E-03 | 0,93 | 8,79E-01 |

|           |               |      |          |      |          |
|-----------|---------------|------|----------|------|----------|
| SLC9A8    | GI_41872702-S | 1,18 | 1,15E-03 | 0,95 | 8,57E-01 |
| CHX10     | GI_34365782-S | 1,14 | 1,16E-03 | 1,01 | 9,71E-01 |
| SLC41A1   | GI_40255193-S | 1,11 | 1,18E-03 | 0,99 | 9,71E-01 |
| FLJ45778  | GI_38348367-S | 1,13 | 1,18E-03 | 0,99 | 9,54E-01 |
| caspr5    | GI_20544138-I | 1,13 | 1,19E-03 | 1,03 | 9,34E-01 |
| CORT      | GI_41327682-S | 1,11 | 1,21E-03 | 0,98 | 9,34E-01 |
| WFDC2     | GI_18379361-A | 1,16 | 1,21E-03 | 1,04 | 8,97E-01 |
| OLIG2     | GI_17978474-S | 1,22 | 1,21E-03 | 0,98 | 9,71E-01 |
| FBXL10    | GI_32698762-S | 1,13 | 1,23E-03 | 0,94 | 8,57E-01 |
| COL13A1   | GI_22027608-A | 1,13 | 1,25E-03 | 0,96 | 8,57E-01 |
| ADH4      | GI_11496889-S | 1,22 | 1,28E-03 | 0,98 | 9,71E-01 |
| GNAQ      | GI_40254461-S | 1,12 | 1,29E-03 | 1,02 | 9,34E-01 |
| MAFA      | GI_42415526-S | 1,14 | 1,31E-03 | 0,99 | 9,71E-01 |
| CPA6      | GI_24111254-S | 1,16 | 1,31E-03 | 1,00 | 9,97E-01 |
| TRIM10    | GI_16519562-A | 1,16 | 1,32E-03 | 1,02 | 9,71E-01 |
| C6orf199  | GI_34222175-S | 1,18 | 1,32E-03 | 1,01 | 9,71E-01 |
| FRZB      | GI_38455387-S | 1,10 | 1,32E-03 | 0,97 | 8,79E-01 |
| LOC284943 | GI_37564923-S | 1,08 | 1,32E-03 | 0,97 | 8,79E-01 |
| LOC400941 | GI_42656495-S | 1,12 | 1,32E-03 | 1,01 | 9,71E-01 |
| FLJ25124  | GI_24432064-S | 1,23 | 1,33E-03 | 0,96 | 9,35E-01 |
| ZNF541    | GI_14149978-S | 1,21 | 1,33E-03 | 1,01 | 9,71E-01 |
| LOC375887 | GI_37550975-S | 1,12 | 1,34E-03 | 1,03 | 9,04E-01 |
| NANOG     | GI_13376297-S | 1,14 | 1,34E-03 | 1,00 | 9,71E-01 |
| NOS2A     | GI_24041028-I | 1,13 | 1,35E-03 | 0,96 | 8,79E-01 |
| C9        | GI_31542289-S | 1,10 | 1,35E-03 | 0,98 | 9,57E-01 |
| JPHL1     | GI_33859758-S | 1,13 | 1,37E-03 | 0,96 | 8,79E-01 |
| JM4       | GI_6005793-S  | 1,27 | 1,40E-03 | 0,98 | 9,71E-01 |
| KRTAP20-2 | GI_31791013-S | 1,10 | 1,40E-03 | 1,00 | 9,71E-01 |
| ANP32E    | GI_23463320-S | 1,13 | 1,40E-03 | 0,97 | 9,04E-01 |
| OR2C3     | GI_37620203-S | 1,17 | 1,43E-03 | 1,02 | 9,71E-01 |
| MGC2574   | GI_13129103-S | 1,16 | 1,43E-03 | 0,99 | 9,71E-01 |
| S100A5    | GI_4506766-S  | 1,15 | 1,44E-03 | 0,99 | 9,71E-01 |
| MGC26963  | GI_37059795-S | 1,20 | 1,44E-03 | 1,01 | 9,71E-01 |
| MYEF2     | GI_33620746-S | 1,11 | 1,45E-03 | 0,97 | 9,04E-01 |
| RFT1      | GI_31377635-S | 1,10 | 1,45E-03 | 0,96 | 8,03E-01 |
| ARHGEF17  | GI_21361457-S | 1,17 | 1,46E-03 | 1,00 | 9,73E-01 |

|                  |               |               |          |          |          |          |
|------------------|---------------|---------------|----------|----------|----------|----------|
| LOC401644        | GI_42659532-S | 1,16          | 1,46E-03 | 1,00     | 9,75E-01 |          |
| LOC400650        | GI_42661395-S | 1,13          | 1,48E-03 | 0,99     | 9,71E-01 |          |
| PHF7             | GI_27894288-I | 1,16          | 1,50E-03 | 0,99     | 9,71E-01 |          |
| EIF2B4           | GI_41281816-I | 1,08          | 1,50E-03 | 0,96     | 8,57E-01 |          |
| HAS1             | GI_4504338-S  | 1,18          | 1,51E-03 | 0,99     | 9,71E-01 |          |
| KNS2             | GI_34916055-I | 1,14          | 1,51E-03 | 0,95     | 8,57E-01 |          |
| HOXD9            | GI_23397673-S | 1,19          | 1,52E-03 | 1,02     | 9,71E-01 |          |
| TFAP2A           | GI_4507440-S  | 1,20          | 1,54E-03 | 0,98     | 9,71E-01 |          |
| CBLN2            | GI_40255263-S | 1,14          | 1,54E-03 | 1,01     | 9,71E-01 |          |
| ARRDC3           | GI_32698735-S | 1,17          | 1,59E-03 | 1,03     | 9,34E-01 |          |
| LOC400360        | GI_42660432-S | 1,12          | 1,59E-03 | 0,99     | 9,71E-01 |          |
| MPDZ             | GI_4505230-S  | 1,15          | 1,59E-03 | 1,02     | 9,71E-01 |          |
| LOC126295        | GI_28315872-S | 1,15          | 1,61E-03 | 1,01     | 9,71E-01 |          |
| KIAA0375         | GI_27480863-S | 1,19          | 1,62E-03 | 1,01     | 9,71E-01 |          |
| APOM             | GI_22091451-S | 1,15          | 1,65E-03 | 1,00     | 9,88E-01 |          |
| LOC374843        | GI_37544988-S | 1,26          | 1,65E-03 | 1,04     | 9,46E-01 |          |
| LOC375036        | GI_37548664-S | 1,15          | 1,65E-03 | 0,99     | 9,71E-01 |          |
| RANBP3           | GI_4506408-I  | 1,15          | 1,65E-03 | 0,93     | 8,57E-01 |          |
| ZNF563           | GI_21687236-S | 1,15          | 1,65E-03 | 1,01     | 9,71E-01 |          |
| MGC2752          | GI_33859747-S | 1,41          | 1,67E-03 | 1,01     | 9,71E-01 |          |
| RASAL1           | GI_4759025-S  | 1,22          | 1,70E-03 | 1,00     | 9,77E-01 |          |
| ZFP28            | GI_22094124-S | 1,08          | 1,72E-03 | 0,98     | 9,34E-01 |          |
| LOC375508        | GI_37552191-S | 1,17          | 1,72E-03 | 1,01     | 9,71E-01 |          |
| LOC286478        | GI_27501414-S | 1,14          | 1,76E-03 | 1,00     | 9,88E-01 |          |
| ZFP95            | GI_21483180-I | 1,15          | 1,76E-03 | 1,04     | 9,04E-01 |          |
| SPOCK            | GI_15451924-S | 1,12          | 1,77E-03 | 1,02     | 9,34E-01 |          |
| LOC392849        | GI_41148408-S | 1,16          | 1,80E-03 | 1,01     | 9,71E-01 |          |
| DKFZP564A022     | GI_21361953-S | 1,29          | 1,80E-03 | 0,94     | 8,97E-01 |          |
| LOC146489        | GI_37541994-S | 1,13          | 1,82E-03 | 0,99     | 9,71E-01 |          |
| C6orf76          | GI_13376188-S | 1,14          | 1,86E-03 | 0,99     | 9,71E-01 |          |
| LOC400681        | GI_42662014-S | 1,12          | 1,87E-03 | 0,99     | 9,71E-01 |          |
| GAL3ST-4         | GI_31542834-S | 1,34          | 1,87E-03 | 0,97     | 9,71E-01 |          |
| MGC34824         | GI_27734974-S | 1,16          | 1,87E-03 | 0,97     | 9,61E-01 |          |
| <u>cluster 2</u> | FUT4          | GI_4503810-S  | 0,77     | 1,03E-05 | 0,93     | 7,55E-01 |
|                  | TSPYQ1        | GI_13435134-S | 0,83     | 1,03E-05 | 0,94     | 2,21E-01 |

|           |               |      |          |      |          |
|-----------|---------------|------|----------|------|----------|
| K6IRS4    | GI_31341312-S | 0,84 | 4,40E-05 | 0,96 | 8,79E-01 |
| AD-017    | GI_8923854-I  | 0,71 | 6,07E-05 | 0,93 | 8,79E-01 |
| ADAMTS18  | GI_40806186-I | 0,73 | 1,00E-04 | 0,88 | 7,13E-01 |
| CGI-94    | GI_7705808-S  | 0,78 | 1,00E-04 | 1,01 | 9,71E-01 |
| MGC42157  | GI_23397529-S | 0,82 | 1,09E-04 | 0,96 | 8,79E-01 |
| MTRR      | GI_4505278-I  | 0,83 | 1,09E-04 | 0,97 | 8,97E-01 |
| GIPR      | GI_45545425-S | 0,84 | 1,15E-04 | 1,01 | 9,71E-01 |
| PSG3      | GI_42476158-S | 0,83 | 1,15E-04 | 0,98 | 9,34E-01 |
| LOC201181 | GI_37543738-S | 0,87 | 1,31E-04 | 1,06 | 7,55E-01 |
| PARD6B    | GI_37555952-S | 0,86 | 1,37E-04 | 0,99 | 9,71E-01 |
| FZD7      | GI_4503832-S  | 0,81 | 1,63E-04 | 0,98 | 9,71E-01 |
| ING1      | GI_38201666-I | 0,76 | 1,75E-04 | 0,94 | 7,97E-01 |
| MGC42638  | GI_31341671-S | 0,81 | 1,84E-04 | 0,96 | 8,79E-01 |
| RNF6      | GI_34305294-I | 0,85 | 2,06E-04 | 0,99 | 9,71E-01 |
| PCDH11Y   | GI_14589941-A | 0,86 | 2,26E-04 | 1,02 | 9,71E-01 |
| AKAP28    | GI_45433550-S | 0,83 | 2,46E-04 | 0,91 | 2,21E-01 |
| TPIP      | GI_40549426-I | 0,89 | 2,55E-04 | 1,06 | 7,55E-01 |
| C14orf42  | GI_37545960-S | 0,80 | 2,76E-04 | 0,98 | 9,71E-01 |
| EML1      | GI_4758267-S  | 0,82 | 2,76E-04 | 0,96 | 8,98E-01 |
| ADRA1A    | GI_15451756-I | 0,67 | 2,76E-04 | 0,93 | 9,34E-01 |
| GPR38     | GI_4504094-S  | 0,86 | 2,76E-04 | 0,98 | 9,34E-01 |
| HSFY      | GI_24211016-I | 0,84 | 2,95E-04 | 0,95 | 7,55E-01 |
| FOXA1     | GI_24497500-S | 0,77 | 2,98E-04 | 0,93 | 8,57E-01 |
| LOC388528 | GI_41150960-S | 0,82 | 3,10E-04 | 0,95 | 8,79E-01 |
| GAGE7     | GI_11024640-S | 0,87 | 3,19E-04 | 1,05 | 8,57E-01 |
| KIAA1219  | GI_34787408-S | 0,84 | 3,19E-04 | 0,97 | 9,05E-01 |
| GAGEB1    | GI_9558760-S  | 0,89 | 3,28E-04 | 1,00 | 9,71E-01 |
| CLDN3     | GI_21536298-S | 0,85 | 3,28E-04 | 0,99 | 9,71E-01 |
| KCNE2     | GI_27436977-S | 0,86 | 3,54E-04 | 0,96 | 8,57E-01 |
| DYRK2     | GI_5922003-I  | 0,78 | 3,63E-04 | 0,94 | 8,96E-01 |
| CEACAM7   | GI_5901929-S  | 0,83 | 3,70E-04 | 0,98 | 9,61E-01 |
| LOC51725  | GI_7706492-S  | 0,80 | 3,70E-04 | 0,95 | 8,57E-01 |
| RAB3B     | GI_19923749-S | 0,78 | 3,70E-04 | 1,00 | 9,88E-01 |
| SLC26A8   | GI_20336284-I | 0,87 | 3,87E-04 | 1,01 | 9,71E-01 |
| CDK10     | GI_32528262-I | 0,88 | 3,99E-04 | 1,02 | 9,71E-01 |
| LOC254559 | GI_37540955-S | 0,85 | 4,17E-04 | 0,96 | 8,57E-01 |

|           |               |      |          |      |          |
|-----------|---------------|------|----------|------|----------|
| LOC399921 | GI_42659718-S | 0,77 | 4,17E-04 | 0,92 | 7,86E-01 |
| ZNF382    | GI_31543988-S | 0,80 | 4,17E-04 | 1,01 | 9,71E-01 |
| CACNA1B   | GI_4502522-S  | 0,78 | 4,32E-04 | 0,98 | 9,71E-01 |
| CGI-72    | GI_39653320-I | 0,81 | 4,35E-04 | 0,94 | 7,86E-01 |
| LOC389628 | GI_42658875-S | 0,86 | 4,35E-04 | 0,98 | 9,41E-01 |
| PIWIL1    | GI_34222090-S | 0,87 | 4,35E-04 | 1,01 | 9,71E-01 |
| MGC10981  | GI_14249203-S | 0,85 | 4,44E-04 | 1,07 | 7,55E-01 |
| FLJ39441  | GI_37541617-S | 0,85 | 4,88E-04 | 0,96 | 8,57E-01 |
| PCDH19    | GI_37546220-S | 0,85 | 4,88E-04 | 0,96 | 8,57E-01 |
| GRIA3     | GI_32528272-A | 0,81 | 4,99E-04 | 0,99 | 9,71E-01 |
| ADAM28    | GI_7656862-I  | 0,84 | 5,10E-04 | 0,99 | 9,71E-01 |
| TSC2      | GI_10938006-I | 0,84 | 5,13E-04 | 1,00 | 9,88E-01 |
| AADAT     | GI_33469971-I | 0,85 | 5,26E-04 | 1,03 | 9,34E-01 |
| KRT23     | GI_27894338-I | 0,82 | 5,35E-04 | 0,97 | 9,34E-01 |
| PPL       | GI_45439326-S | 0,85 | 5,47E-04 | 0,96 | 8,57E-01 |
| MAFF      | GI_23111001-I | 0,84 | 5,52E-04 | 0,98 | 9,34E-01 |
| SYT14L    | GI_32698758-S | 0,82 | 5,81E-04 | 0,96 | 9,04E-01 |
| TAC4      | GI_26449156-S | 0,83 | 5,91E-04 | 0,99 | 9,71E-01 |
| TLX1      | GI_19923318-S | 0,84 | 5,91E-04 | 0,98 | 9,71E-01 |
| LOC285777 | GI_27483664-S | 0,83 | 5,97E-04 | 1,03 | 8,97E-01 |
| OR8B8     | GI_28570169-S | 0,81 | 6,14E-04 | 0,94 | 8,57E-01 |
| MRPL15    | GI_21265077-S | 0,76 | 6,26E-04 | 1,03 | 9,71E-01 |
| GUCA1B    | GI_15887357-S | 0,83 | 6,44E-04 | 0,96 | 9,04E-01 |
| LOC402709 | GI_42658723-S | 0,81 | 6,58E-04 | 0,98 | 9,71E-01 |
| LOC375598 | GI_37538617-S | 0,86 | 6,80E-04 | 0,99 | 9,71E-01 |
| HOXD8     | GI_23510373-S | 0,86 | 6,91E-04 | 1,06 | 7,55E-01 |
| LOC253970 | GI_37545925-S | 0,88 | 7,00E-04 | 1,06 | 7,97E-01 |
| KIAA0319  | GI_7662053-S  | 0,88 | 7,02E-04 | 1,02 | 9,58E-01 |
| BDNF      | GI_34106706-I | 0,85 | 7,24E-04 | 1,05 | 8,57E-01 |
| UGT1A1    | GI_8850235-S  | 0,79 | 7,28E-04 | 0,94 | 8,57E-01 |
| LOC400871 | GI_42662343-S | 0,83 | 7,29E-04 | 0,98 | 9,71E-01 |
| LOC152831 | GI_31343329-S | 0,86 | 7,35E-04 | 0,99 | 9,71E-01 |
| LOC374491 | GI_37545353-S | 0,87 | 7,35E-04 | 0,95 | 8,28E-01 |
| IL1RL1    | GI_27894323-A | 0,80 | 7,47E-04 | 0,96 | 9,34E-01 |
| FLJ25161  | GI_40255264-S | 0,79 | 7,48E-04 | 0,93 | 8,57E-01 |
| CBWD2     | GI_38016203-S | 0,77 | 7,49E-04 | 0,98 | 9,71E-01 |

|           |               |      |          |      |          |
|-----------|---------------|------|----------|------|----------|
| GDF1      | GI_11641419-S | 0,84 | 7,57E-04 | 1,02 | 9,71E-01 |
| LOC376030 | GI_37541166-S | 0,84 | 7,57E-04 | 0,98 | 9,41E-01 |
| RBMS1     | GI_8400723-I  | 0,90 | 7,66E-04 | 1,06 | 7,55E-01 |
| CYP4F2    | GI_13435390-S | 0,81 | 7,80E-04 | 1,01 | 9,71E-01 |
| MSMB      | GI_20302156-I | 0,83 | 7,90E-04 | 1,03 | 9,34E-01 |
| TOPK      | GI_18490990-S | 0,83 | 7,94E-04 | 1,03 | 9,46E-01 |
| MGC20460  | GI_16596683-S | 0,86 | 8,12E-04 | 0,98 | 9,04E-01 |
| DUSP10    | GI_21536330-I | 0,89 | 8,50E-04 | 0,99 | 9,71E-01 |
| KLK11     | GI_21618356-I | 0,86 | 8,50E-04 | 1,00 | 9,81E-01 |
| FLJ35961  | GI_40255105-S | 0,91 | 8,51E-04 | 1,02 | 8,79E-01 |
| LOC115749 | GI_37542922-S | 0,87 | 8,85E-04 | 1,03 | 9,34E-01 |
| NEUROD6   | GI_27475984-S | 0,87 | 8,94E-04 | 1,01 | 9,71E-01 |
| LOC342293 | GI_37541427-S | 0,90 | 9,01E-04 | 1,00 | 9,71E-01 |
| DCOHM     | GI_29788788-S | 0,90 | 9,13E-04 | 1,03 | 9,34E-01 |
| ARMC4     | GI_31657113-S | 0,86 | 9,35E-04 | 1,05 | 8,79E-01 |
| C14orf39  | GI_28372512-S | 0,84 | 9,35E-04 | 1,02 | 9,57E-01 |
| LDB2      | GI_4504970-S  | 0,81 | 9,69E-04 | 1,02 | 9,71E-01 |
| LOC375614 | GI_37538667-S | 0,90 | 9,87E-04 | 1,03 | 8,97E-01 |
| LOC283578 | GI_37545972-S | 0,88 | 9,88E-04 | 1,00 | 9,71E-01 |
| KIAA0608  | GI_37550783-S | 0,90 | 9,88E-04 | 1,00 | 9,71E-01 |
| C4orf6    | GI_5031564-S  | 0,79 | 9,96E-04 | 0,97 | 9,49E-01 |
| CREB3L2   | GI_34740336-S | 0,88 | 1,05E-03 | 1,00 | 9,77E-01 |
| GOLPH2    | GI_29550837-I | 0,84 | 1,07E-03 | 1,05 | 9,04E-01 |
| C9orf27   | GI_10864018-S | 0,88 | 1,09E-03 | 1,03 | 9,34E-01 |
| LOC376707 | GI_37539608-S | 0,86 | 1,14E-03 | 0,98 | 9,34E-01 |
| LOC387946 | GI_41149918-S | 0,88 | 1,16E-03 | 1,00 | 9,88E-01 |
| LOC375045 | GI_37548764-S | 0,84 | 1,16E-03 | 0,98 | 9,71E-01 |
| CNN3      | GI_4502922-S  | 0,79 | 1,21E-03 | 1,10 | 8,57E-01 |
| LOC375548 | GI_37538337-S | 0,88 | 1,23E-03 | 1,01 | 9,71E-01 |
| SGCZ      | GI_21040252-S | 0,87 | 1,26E-03 | 1,02 | 9,71E-01 |
| FTSJ1     | GI_29029590-I | 0,84 | 1,32E-03 | 0,95 | 8,57E-01 |
| LOC125595 | GI_37545854-S | 0,83 | 1,40E-03 | 0,96 | 9,04E-01 |
| KIAA1221  | GI_7705301-S  | 0,87 | 1,46E-03 | 1,01 | 9,71E-01 |
| CASC2     | GI_31341470-S | 0,74 | 1,50E-03 | 0,91 | 8,79E-01 |
| AQP8      | GI_45446751-S | 0,85 | 1,50E-03 | 1,00 | 9,77E-01 |
| ZNF28     | GI_37552010-S | 0,86 | 1,51E-03 | 0,98 | 9,71E-01 |

|           |               |      |          |      |          |
|-----------|---------------|------|----------|------|----------|
| CD53      | GI_21237756-S | 0,78 | 1,55E-03 | 1,02 | 9,71E-01 |
| ACTC      | GI_10938011-S | 0,87 | 1,59E-03 | 0,99 | 9,71E-01 |
| HAPLN1    | GI_40254458-S | 0,92 | 1,59E-03 | 1,04 | 8,57E-01 |
| LOC374989 | GI_37540084-S | 0,82 | 1,60E-03 | 0,96 | 9,34E-01 |
| NT5C1B    | GI_24308357-S | 0,86 | 1,61E-03 | 1,00 | 9,96E-01 |
| DMD       | GI_5032290-I  | 0,84 | 1,64E-03 | 0,99 | 9,71E-01 |
| INSM1     | GI_44890063-S | 0,85 | 1,64E-03 | 1,00 | 9,82E-01 |
| SNX11     | GI_23111027-I | 0,83 | 1,67E-03 | 1,03 | 9,61E-01 |
| PCDHGA10  | GI_14196447-I | 0,84 | 1,74E-03 | 0,97 | 9,57E-01 |
| WFDC8     | GI_31657106-I | 0,91 | 1,74E-03 | 1,03 | 7,97E-01 |
| HSPC157   | GI_7661813-S  | 0,73 | 1,81E-03 | 1,10 | 8,57E-01 |
| NYD-SP12  | GI_15100157-S | 0,84 | 1,82E-03 | 0,99 | 9,71E-01 |

---
